# Supplementary material
Source: MDPI journal article supplement (https://www.mdpi.com/2073-4344/12/12/1670)
Supplement: s1 [file s1 › catalysts-2074929-supplementary.pdf]

## Article

# Sulfur-Resistant CeO<sub>2</sub>-Supported Pt Catalyst for Waste-to-Hydrogen: Effect of Catalyst Synthesis Method

Ga-Ram Hong <sup>1</sup>, Kyoung-Jin Kim <sup>1</sup>, Seon-Yong Ahn <sup>1</sup>, Beom-Jun Kim <sup>1</sup>, Ho-Ryong Park <sup>1</sup>, Yeol-Lim Lee <sup>2</sup>, Sang Soo Lee <sup>1</sup>, Yukwon Jeon <sup>1</sup> and Hyun-Seog Roh <sup>1,\*</sup>

<sup>1</sup> Department of Environmental and Energy Engineering, Yonsei University, 1 Yonseidae-gil, Wonju, Gangwon 26493, Republic of Korea

<sup>2</sup> Department of Chemical Engineering, Keimyung University, 1095 Dalgubeol-daero, Dalseo-gu, Daegu 42601, Republic of Korea

\* Correspondence: hsroh@yonsei.ac.kr

## Supplementary Materials:

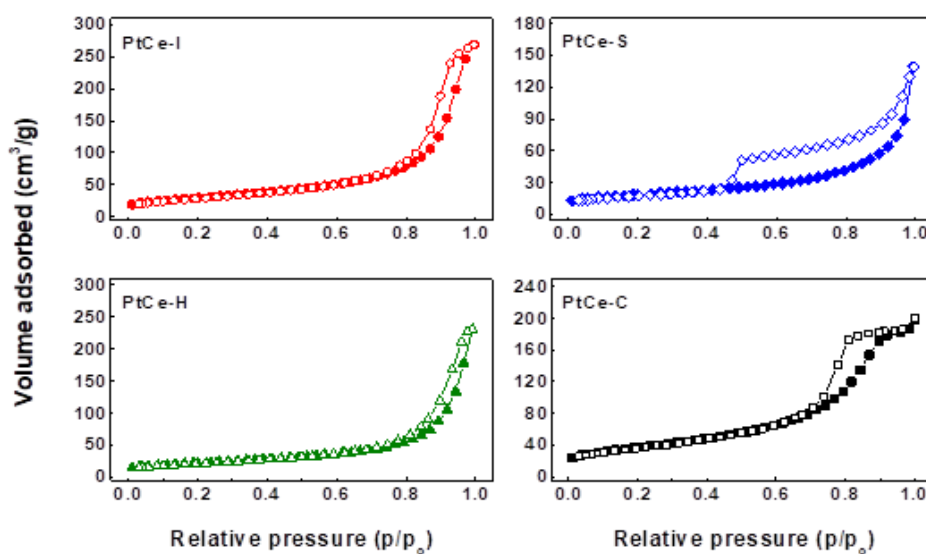

**Figure S1.** Adsorption-desorption isotherms of CeO<sub>2</sub>-supported Pt catalysts prepared by various synthesis methods.

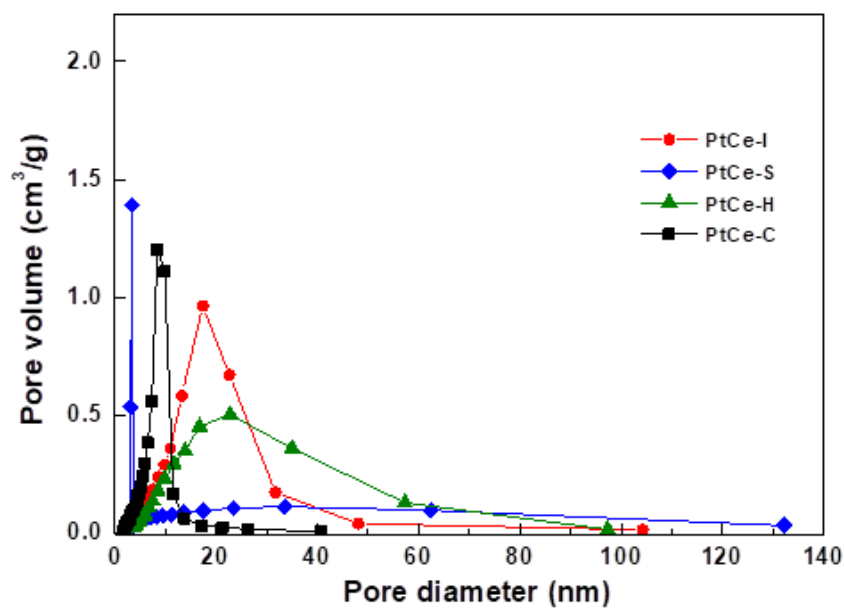

Figure S2. Pore distribution of CeO<sub>2</sub>-supported Pt catalysts prepared by various synthesis methods.

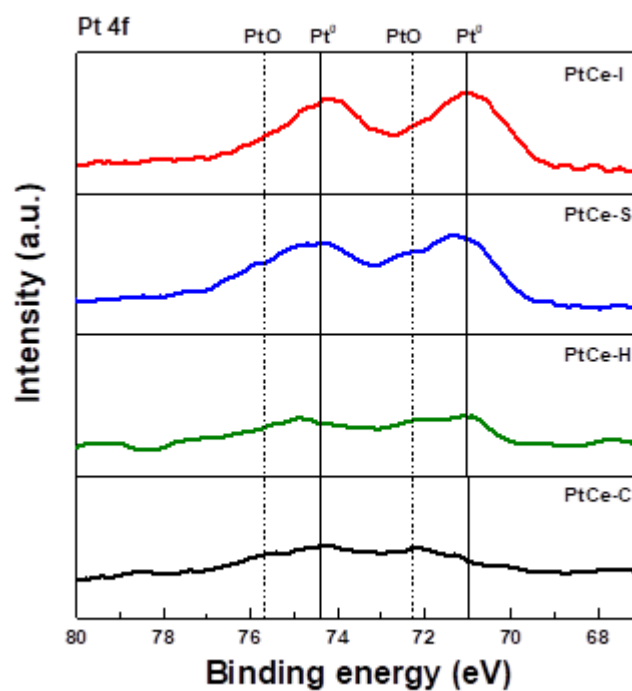

Figure S3. XPS Pt 4f spectra of poisoned CeO<sub>2</sub>-supported Pt catalysts prepared by various synthesis methods.

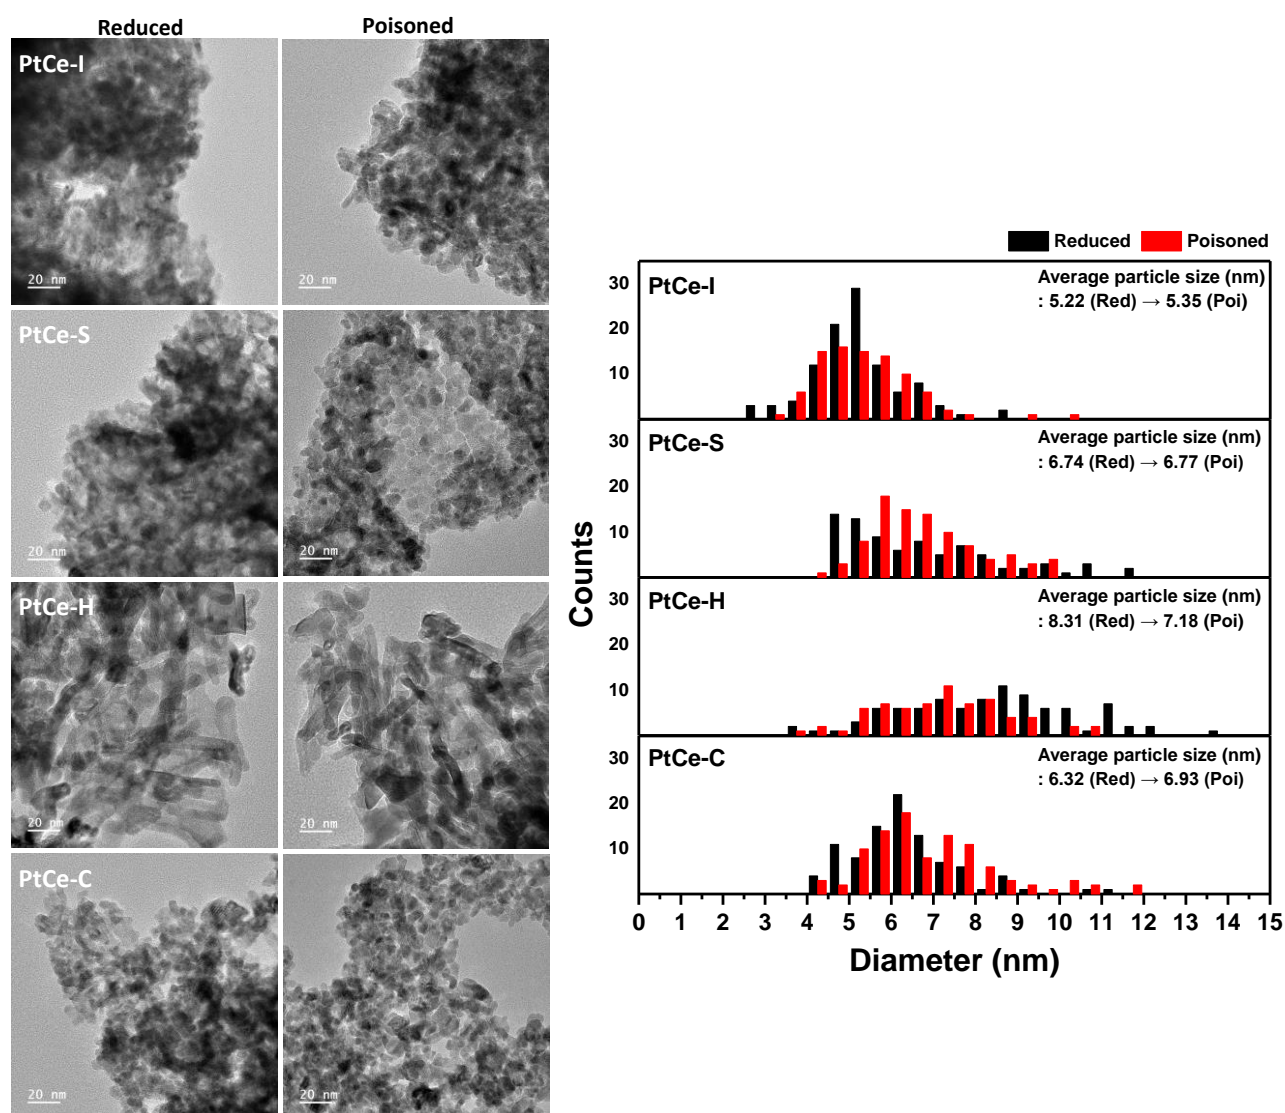

**Figure S4.** TEM images and particle size distribution results of CeO<sub>2</sub>-supported Pt catalysts prepared by various synthesis methods.

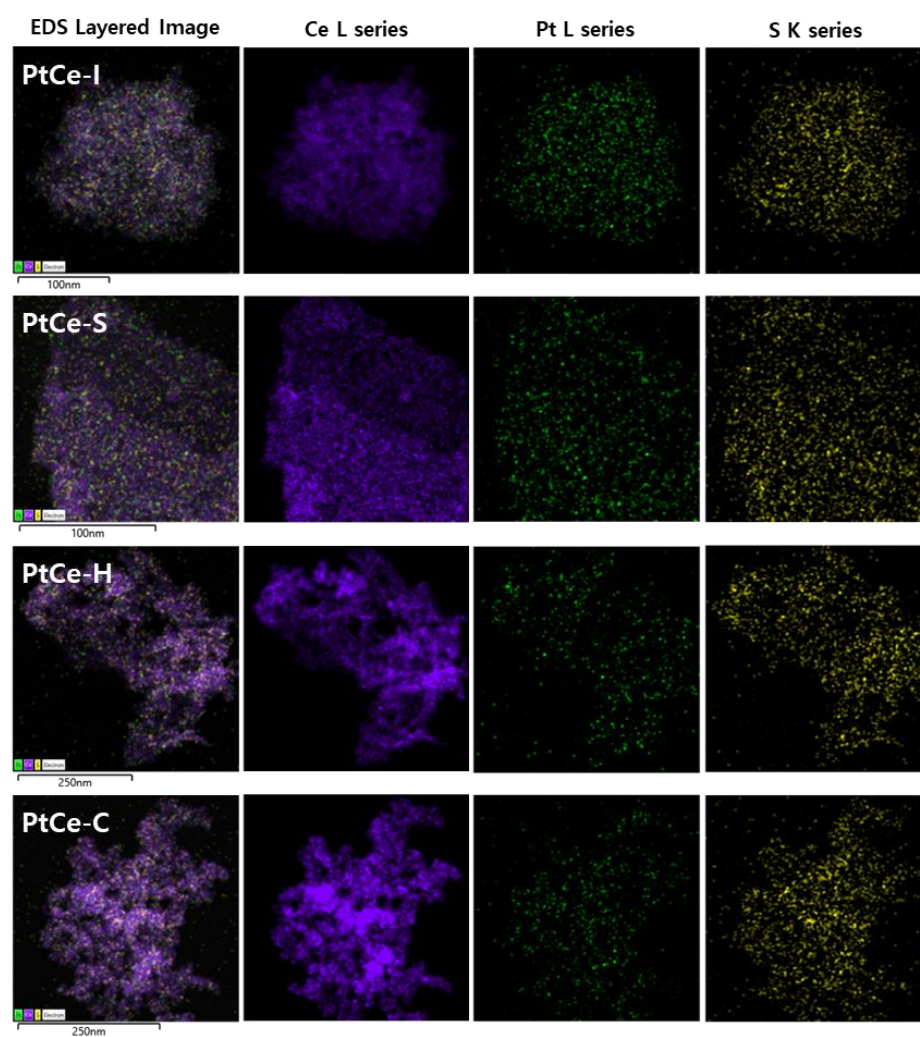

**Figure S5.** TEM images and EDS mapping results of poisoned CeO<sub>2</sub>-supported Pt catalysts prepared by various synthesis methods.

**Table S1.** Numerical values of catalytic performance at initial (0 h) and poisoned (15 h) points of CeO<sub>2</sub>-supported Pt catalysts prepared by various synthesis methods.

| Catalyst | Time on stream (h) | CO conversion (%) | CO <sub>2</sub> selectivity (%) | CH <sub>4</sub> selectivity (%) | H <sub>2</sub> yield (%) |
|----------|--------------------|-------------------|---------------------------------|---------------------------------|--------------------------|
| PtCe-I   | 0                  | 93.7              | 100                             | 0                               | 84.4                     |
|          | 15                 | 85.1              | 100                             | 0                               | 77.7                     |
| PtCe-S   | 0                  | 84.6              | 100                             | 0                               | 66.8                     |
|          | 15                 | 63.8              | 100                             | 0                               | 58.7                     |
| PtCe-H   | 0                  | 57.0              | 100                             | 0                               | 46.1                     |
|          | 15                 | 28.1              | 100                             | 0                               | 26.7                     |
| PtCe-C   | 0                  | 18.5              | 17.1                            | 82.9                            | 0.7                      |
|          | 15                 | 4.1               | 4.4                             | 95.6                            | 1.0                      |

**Table S2.** The actual Pt contents of as-synthesized catalysts determined by ICP-OES.

| Catalyst | Pt content (wt%) |
|----------|------------------|
| PtCe-I   | 1.96             |
| PtCe-S   | 1.93             |
| PtCe-H   | 1.88             |
| PtCe-C   | 1.90             |
